# Supplementary material for: Imidazolized magnetic nanovectors with endosome disrupting moieties for the intracellular delivery and imaging of siRNA
Source: Royal Society of Chemistry journal article supplement (doi:10.1039/c4tb01274g), 2014-10-31
Supplement: c4tb01274g1.pdf [file c4tb01274g1.pdf]

## Electronic Supplementary Information (ESI) of Imidazolized magnetic nanovectors with endosome disrupting moieties for intracellular delivery and imaging of siRNA

Eunjung Kim, Hwunjae Lee, Yonghee An, Eunji Jang, Eun-Kyung Lim, Byunghoon Kang, Jin-Suck Suh,  
Yong-Min Huh\* and Seungjoo Haam\*

\*Department of Radiology, College of Medicine, Yonsei University, Seoul Republic of Korea

\*Department of Chemical and Biomolecular Engineering, Yonsei University, Seoul, Republic of Korea

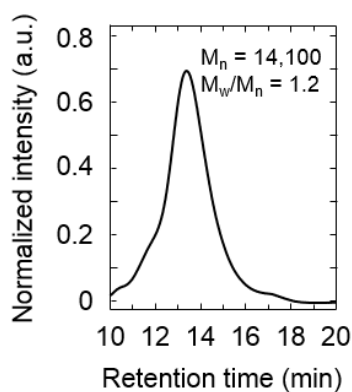

**Fig. S1** A GPC trace of PLZ recorded at 40°C in DMF.

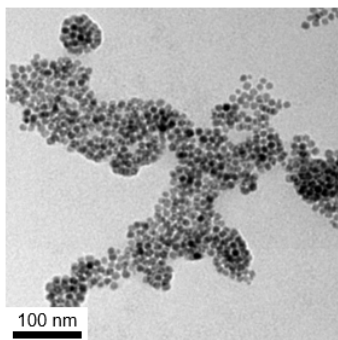

**Fig. S2** TEM image of non-imidazolized MNVs (MNVs).

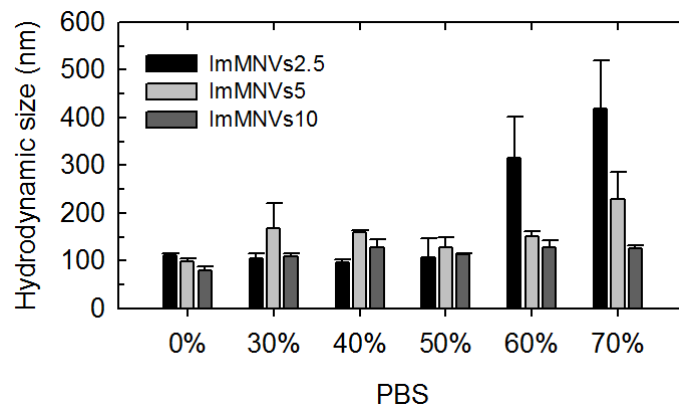

**Fig. S3** Hydrodynamic size of ImMNVs2.5, ImMNVs5, and ImMNVs10 prepared in different concentration of PBS by DLS.

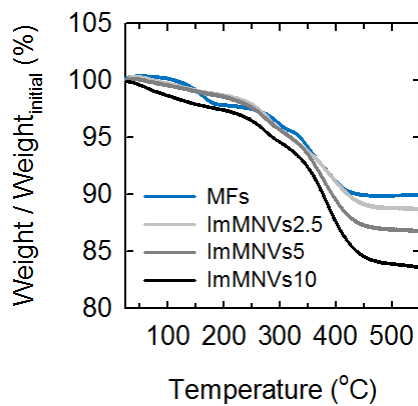

**Fig. S4** TGA curves of MFs and ImMNVs prepared with different PLI/MFs ratios (2.5, 5, and 10).

**Table S1** Schematic illustration of the proposed closed-pack structure of ImMNVs and calculated numbers of PLI coated onto the surface of MFs in ImMNVs.

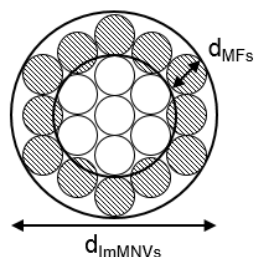

| Entry     | <sup>a</sup> Diameter (nm) | <sup>b</sup> N <sub>MFs, total</sub> | <sup>c</sup> N <sub>MFs</sub> | <sup>d</sup> N <sub>PLI, total</sub> | <sup>e</sup> N <sub>PLI</sub> |
|-----------|----------------------------|--------------------------------------|-------------------------------|--------------------------------------|-------------------------------|
| ImMNVs2.5 | 61.7 ± 9.0                 | 120                                  | 55                            | 634                                  | 11.6                          |
| ImMNVs5   | 61.3 ± 8.6                 | 118                                  | 54                            | 743                                  | 13.7                          |
| ImMNVs10  | 49.2 ± 2.9                 | 61                                   | 33                            | 495                                  | 14.9                          |

<sup>a</sup>The diameter of ImMNVs based on the TEM images (MFs: 11.3 ± 1.0 nm)

<sup>b</sup>The total number of MFs per ImMNV (all the spheres in the close-packed structure), which is given by the equation:  $N_{MFs, total} = (d_{ImMNVs}/d_{MFs})^3 \times 0.74$ , with  $d_{ImMNVs}$ ,  $d_{MFs}$ , and 0.74 corresponding to the average diameter of ImMNVs and MFs determined from the TEM images, and the value of the highest packing density ( $\approx \pi/3\sqrt{2}$ ) of ImMNVs<sup>1</sup>.

<sup>c</sup>The number of MFs on the outer layer of ImMNV per particle (the outer patterned spheres in the close-packed structure), which is defined by the equation:  $N_{MFs} = N_{MFs, total} - [(d_{ImMNVs} - d_{MFs} \times 2)^3 / d_{MFs}^3] \times 0.74$ .

<sup>d</sup>The total number of PLI polymer encapsulated into each ImMNV, which is obtained using the equation:  $N_{PLI, total} = [(N_{MFs, total} \times d_{MF}^3 \times \rho) \times R \times N_A] / M_n$ , where  $\rho$  (g/cm<sup>3</sup>) is the MF density, R is the organic/inorganic mass ratio determined by TGA analysis,  $N_A$  (mol<sup>-1</sup>) is the Avogadro's number, and  $M_n$  (g/mol) is the molecular weight of PLI, respectively.

<sup>e</sup>The number of PLI polymer coated onto the MF surface in ImMNVs, calculated by dividing  $N_{PLI, total}$  into  $N_{MFs}$ .

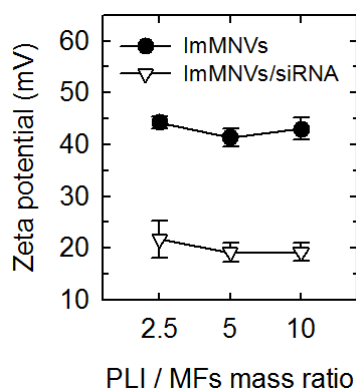

**Fig. S5** Zeta potentials of ImMNVs prepared at various PLI/MFs mass ratios (2.5, 5, and 10) and ImMNVs/siRNA complexes (PLI/siRNA weight ratio = 25).

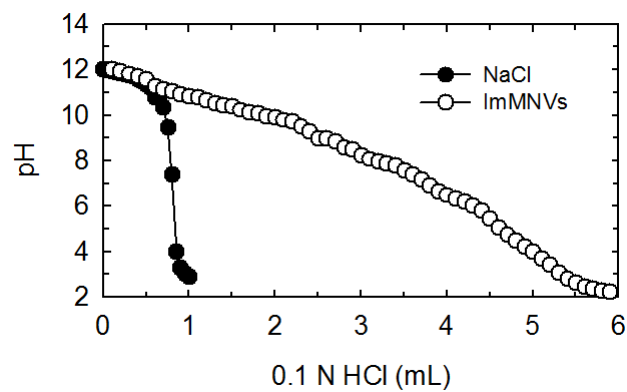

**Fig. S6** Acid-base titration curves of 150 mM NaCl and ImMNVs10.

**Reference**

1. T. C. Hales, *Historical Overview of the Kepler Conjecture*, Springer New York, 2011.
